# Supplementary material for: Modulation of Innate Immunity by G-CSF and Inflammatory Response by LBPK95A Improves the Outcome of Sepsis in a Rat Model
Source: Hindawi journal article supplement (doi:10.1155/2018/6085095), 2018-11-07

Figure S1

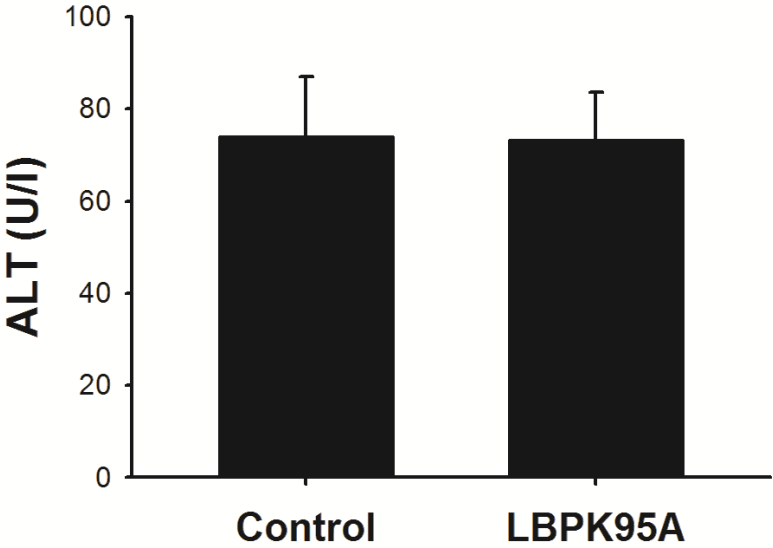

Supplement: f1 [file 6085095.f1.pdf]
