# Supplementary material for: Modulation of Innate Immunity by G-CSF and Inflammatory Response by LBPK95A Improves the Outcome of Sepsis in a Rat Model
Source: Hindawi journal article supplement (doi:10.1155/2018/6085095), 2018-11-07

Figure S2

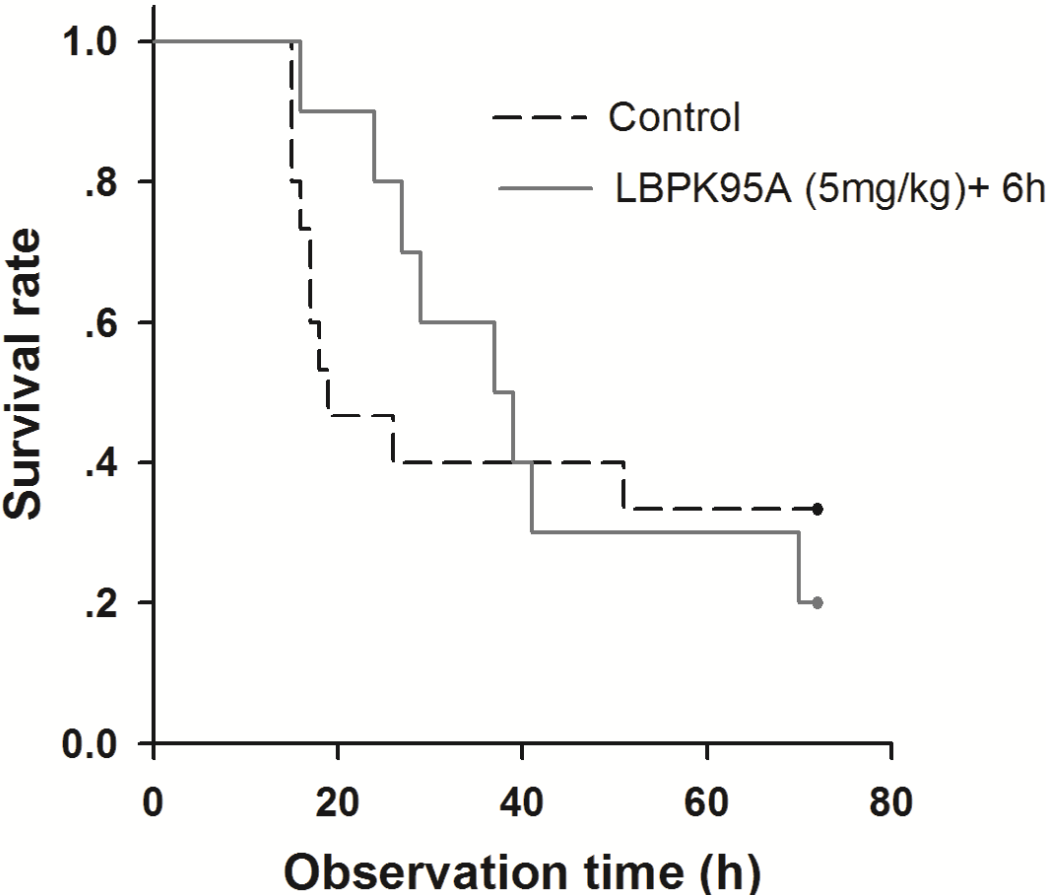

Supplement: f2 [file 6085095.f2.pdf]
